# Supplementary material for: Hydrogenation of nitroarenes using defined iron–phosphine catalysts
Source: Royal Society of Chemistry journal article supplement (doi:10.1039/c3cc42983k), 2013-01-01
Supplement: c3cc42983k.pdf [file c3cc42983k.pdf]

## Supporting Information

### Table of Contents:

|    |                                                                               |
|----|-------------------------------------------------------------------------------|
| S1 | General information                                                           |
| S2 | Reaction parameters                                                           |
|    | Variation of:                                                                 |
|    | -solvent                                                                      |
|    | - acid                                                                        |
|    | - acid concentration                                                          |
|    | - hydrogen pressure                                                           |
|    | - temperature                                                                 |
|    | - catalyst concentration                                                      |
|    | - iron precursor for the in situ generated catalytic system                   |
| S3 | H-NMR and P-NMR signals of $[\text{FeH}(\text{H}_2)(\text{L2})][\text{BF}_4]$ |
| S4 | Preparation of the defined complexes                                          |
| S5 | General Procedure for hydrogenation of nitroarene                             |
| S6 | References                                                                    |

## S1. General Information

---

### General comments

All reactions were carried out under argon atmosphere. Chemicals were purchased from Aldrich, Fluka, Acros, Alfa Aesar and used without further purification. NMR data were recorded on Bruker ARX 400 and Bruker ARX 300 spectrometers.  $^{13}\text{C}$ - and  $^1\text{H}$ -NMR spectra were referenced to signals of the deuterio solvents. The Gas chromatography analysis was performed on an Agilent HP-6890 instrument with a FID detector and HP-5 capillary column (polydimethylsiloxane with 5% phenyl groups, 30 m, 0.32 mm i.d., 0.25  $\mu\text{m}$  film thickness) using argon as carrier gas. Gas chromatography-mass analysis was carried out on an Agilent HP-5890 instrument with an Agilent HP-5973 Mass Selective Detector (EI) and HP-5 capillary column (polydimethylsiloxane with 5% phenyl groups, 30 m, 0.25 mm i.d., 0.25  $\mu\text{m}$  film thickness) using helium carrier gas. HRMS was performed on MAT 95XP (EI) and Agilent 6210 Time-of-Flight LC/MS (ESI).

All hydrogenation reactions were carried out in an eight-fold parallel reactor array with a reactor volume of 3.0 mL (Institute of Automation (IAT), Richard Wagner Str. 31/H. 8, 18119 Rostock-Warnemünde, Germany).

The in situ NMR-experiments were performed in a sapphire tube<sup>[1]</sup> on a BRUKER Avance 400 spectrometer using a broadband observe probe, which was properly tuned and matched each time. The integrals of the different spectra were measured and calibrated using standard NMR software (i.e. Topspin version 1.3, BRUKER, Germany).

## S1. Reaction parameters

**Table 1.** Iron-catalyzed hydrogenation of nitrobenzene: Influence of solvents.<sup>a</sup>

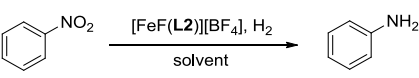

| Entry | solvent        | conv.<br>(%) <sup>b</sup> | yield<br>(%) <sup>b</sup> | select.<br>(%) |
|-------|----------------|---------------------------|---------------------------|----------------|
| 1     | MeOH           | 31                        | 25                        | 79             |
| 2     | EtOH           | 54                        | 42                        | 82             |
| 3     | <i>i</i> -PrOH | 51                        | 49                        | 96             |
| 4     | <i>t</i> -AmOH | 87                        | 87                        | >99            |
| 5     | THF            | 82                        | 79                        | 96             |
| 6     | Toluene        | 14                        | 9                         | 69             |

<sup>a</sup> Reaction conditions: 0.5 mmol nitrobenzene, 2 mol% [FeF(L2)][BF4], 120 °C, 2 h, 30 bar H<sub>2</sub>, 1.5 mL solvent, 20 μL TFA. <sup>b</sup> Determined by GC using *n*-hexadecane as an internal standard.

**Table 2.** Screening of different acids for the iron-tetraphos-catalyzed hydrogenation of nitrobenzene.<sup>[a]</sup>

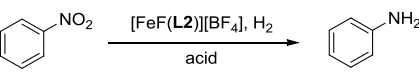

| entry | acid                                               | conv.<br>(%) <sup>[b]</sup> | yield<br>(%) <sup>[b]</sup> | select.<br>(%) |
|-------|----------------------------------------------------|-----------------------------|-----------------------------|----------------|
| 1     | acetic acid                                        | -                           | -                           | -              |
| 2     | benzoic acid                                       | -                           | -                           | -              |
| 3     | p-toluenesulfonic acid                             | 13                          | 13                          | >99            |
| 4     | benzenesulfonic acid                               | 15                          | 15                          | >99            |
| 5     | triphenylacetic acid                               | -                           | -                           | -              |
| 6     | Trifluoroacetic acid                               | 54                          | 54                          | >99            |
| 7     | methanesulfonic acid                               | 19                          | 16                          | 84             |
| 8     | methanesulfonic acid<br>anhydride                  | 20                          | 15                          | 75             |
| 9     | phosphoric acid                                    | -                           | -                           | -              |
| 10    | tetrafluoroboric acid<br>(40% in H <sub>2</sub> O) | 30                          | 27                          | 90             |

[a] Reaction conditions: 0.5 mmol nitrobenzene, 1 mol% [FeF(L2)][BF4], 120 °C, 2 h, 20 bar H<sub>2</sub>, 1.5 mL *t*-AmOH, 50 mol% TFA. [b] Determined by GC using *n*-hexadecane as an internal standard.

**Table 3.** Varying the TFA concentration for the iron-tetraphos-catalyzed hydrogenation of nitrobenzene.<sup>[a]</sup>

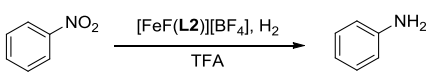

| entry | TFA in mol% | conv. (%) <sup>[b]</sup> | yield (%) <sup>[b]</sup> | select. (%) |
|-------|-------------|--------------------------|--------------------------|-------------|
| 1     | -           | -                        | -                        | -           |
| 2     | 12.5        | 20                       | 20                       | >99         |
| 3     | 25          | 32                       | 31                       | 97          |
| 4     | 50          | 54                       | 52                       | 96          |
| 5     | 100         | 74                       | 68                       | 92          |
| 6     | 150         | 77                       | 70                       | 91          |

[a] Reaction conditions: 0.5 mmol nitrobenzene, 1 mol% [FeF(L2)][BF4], 120 °C, 2 h, 20 bar H<sub>2</sub>, 1.5 mL *t*-AmOH, TFA. [b] Determined by GC using *n*-hexadecane as an internal standard.

**Table 4.** Varying the hydrogen pressure for the iron-tetraphos-catalyzed hydrogenation of nitrobenzene.<sup>[a]</sup>

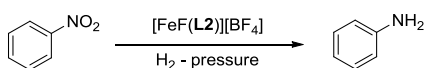

| entry | H <sub>2</sub> pressure (in bar) | conv. (%) <sup>[b]</sup> | yield (%) <sup>[b]</sup> | select. (%) |
|-------|----------------------------------|--------------------------|--------------------------|-------------|
| 1     | 2                                | 11                       | 9                        | 82          |
| 2     | 5                                | 23                       | 20                       | 87          |
| 3     | 10                               | 45                       | 43                       | 96          |
| 4     | 20                               | 54                       | 53                       | 98          |
| 5     | 30                               | 51                       | 48                       | 94          |
| 6     | 40                               | 43                       | 42                       | 98          |
| 7     | 60                               | 33                       | 33                       | >99         |

[a] Reaction conditions: 0.5 mmol nitrobenzene, 1 mol% [FeF(L2)][BF4], 120 °C, 2 h, 20 bar H<sub>2</sub>, 1.5 mL *t*-AmOH, TFA. [b] Determined by GC using *n*-hexadecane as an internal standard.

**Table 5.** Temperature dependence of the iron-tetraphos-catalyzed hydrogenation of nitrobenzene.<sup>[a]</sup>

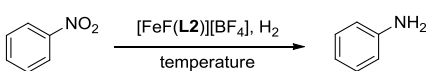

| entry | temperature (in °C) | conv. (%) <sup>[b]</sup> | yield (%) <sup>[b]</sup> | select. (%) |
|-------|---------------------|--------------------------|--------------------------|-------------|
| 1     | 100                 | 42                       | 42                       | >99         |
| 2     | 120                 | 71                       | 69                       | 97          |
| 5     | 140                 | 68                       | 66                       | 97          |

[a] Reaction conditions: 0.5 mmol nitrobenzene, 1 mol% [FeF(L2)][BF4], 120 °C, 2 h, 20 bar H<sub>2</sub>, 1.5 mL *t*-AmOH, 100 mol% TFA. [b] Determined by GC using *n*-hexadecane as an internal standard.

**Table 6.** Catalyst concentration for the iron-tetraphos-catalyzed hydrogenation of nitrobenzene.<sup>[a]</sup>

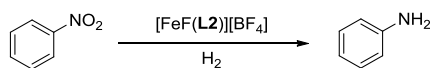

| entry | Catalyst loading<br>(in mol%) | conv.<br>(%) <sup>[b]</sup> | yield<br>(%) <sup>[b]</sup> | select.<br>(%) |
|-------|-------------------------------|-----------------------------|-----------------------------|----------------|
| 1     | 0.1                           | 7                           | 7                           | >99            |
| 2     | 0.5                           | 33                          | 33                          | >99            |
| 3     | 1.0                           | 71                          | 69                          | 97             |
| 4     | 1.5                           | 91                          | 91                          | >99            |
| 5     | 2.0                           | 100                         | >99                         | >99            |

[a] Reaction conditions: 0.5 mmol nitrobenzene, [FeF(L2)][BF4], 120 °C, 2 h, 20 bar H<sub>2</sub>, 1.5 mL *t*-AmOH, 100 mol% TFA. [b] Determined by GC using *n*-hexadecane as an internal standard.

**Table 7.** Different precursor for the hydrogenation of nitrobenzene.<sup>[a]</sup>

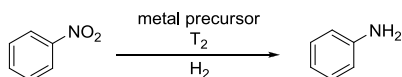

| entry | precursor                                            | conv.<br>(%) <sup>[b]</sup> | yield<br>(%) <sup>[b]</sup> | select.<br>(%) |
|-------|------------------------------------------------------|-----------------------------|-----------------------------|----------------|
| 1     | Fe(BF <sub>4</sub> ) <sub>2</sub> ·6H <sub>2</sub> O | 66                          | 66                          | >99            |
| 2     | Fe(acac) <sub>2</sub>                                | 51                          | 48                          | 94             |
| 3     | Fe(acetate) <sub>2</sub>                             | 54                          | 51                          | 94             |
| 4     | FeCl <sub>2</sub> ·4H <sub>2</sub> O                 | -                           | -                           | -              |
| 5     | Cu(BF <sub>4</sub> ) <sub>2</sub> ·xH <sub>2</sub> O | -                           | -                           | -              |
| 6     | Co(BF <sub>4</sub> ) <sub>2</sub> ·4H <sub>2</sub> O | -                           | -                           | -              |

[a] Reaction conditions: 0.5 mmol nitrobenzene, 1 mol% precursor/ L2, 120 °C, 2 h, 20 bar H<sub>2</sub>, 1.5 mL *t*-AmOH, 50 mol% TFA. [b] Determined by GC using *n*-hexadecane as an internal standard.

S3. In situ NMR-experiments

H-NMR spectra at 20 bar and 233 K

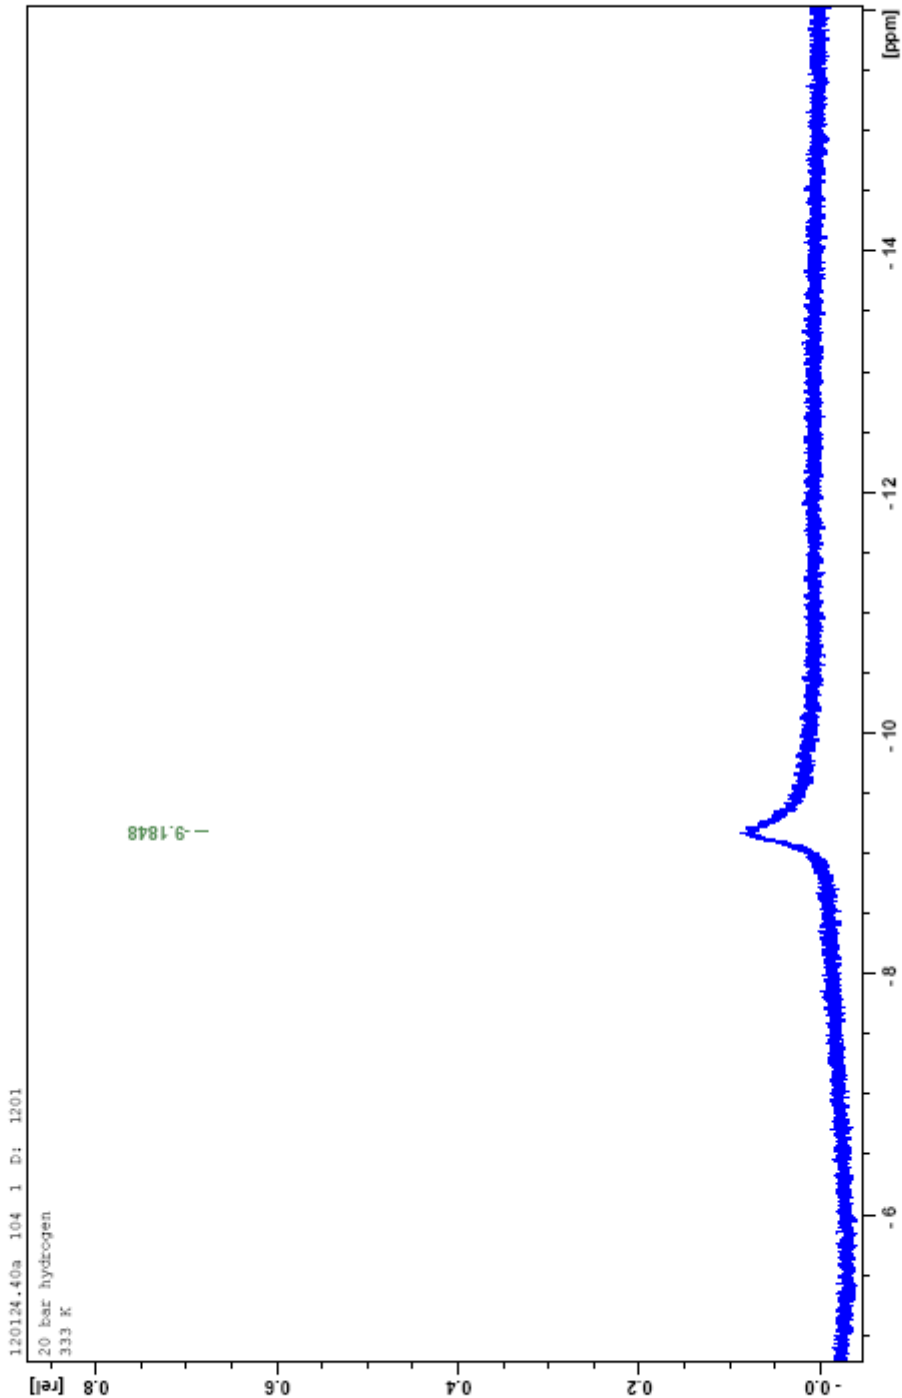

P-NMR spectra at 20 bar and 233 K

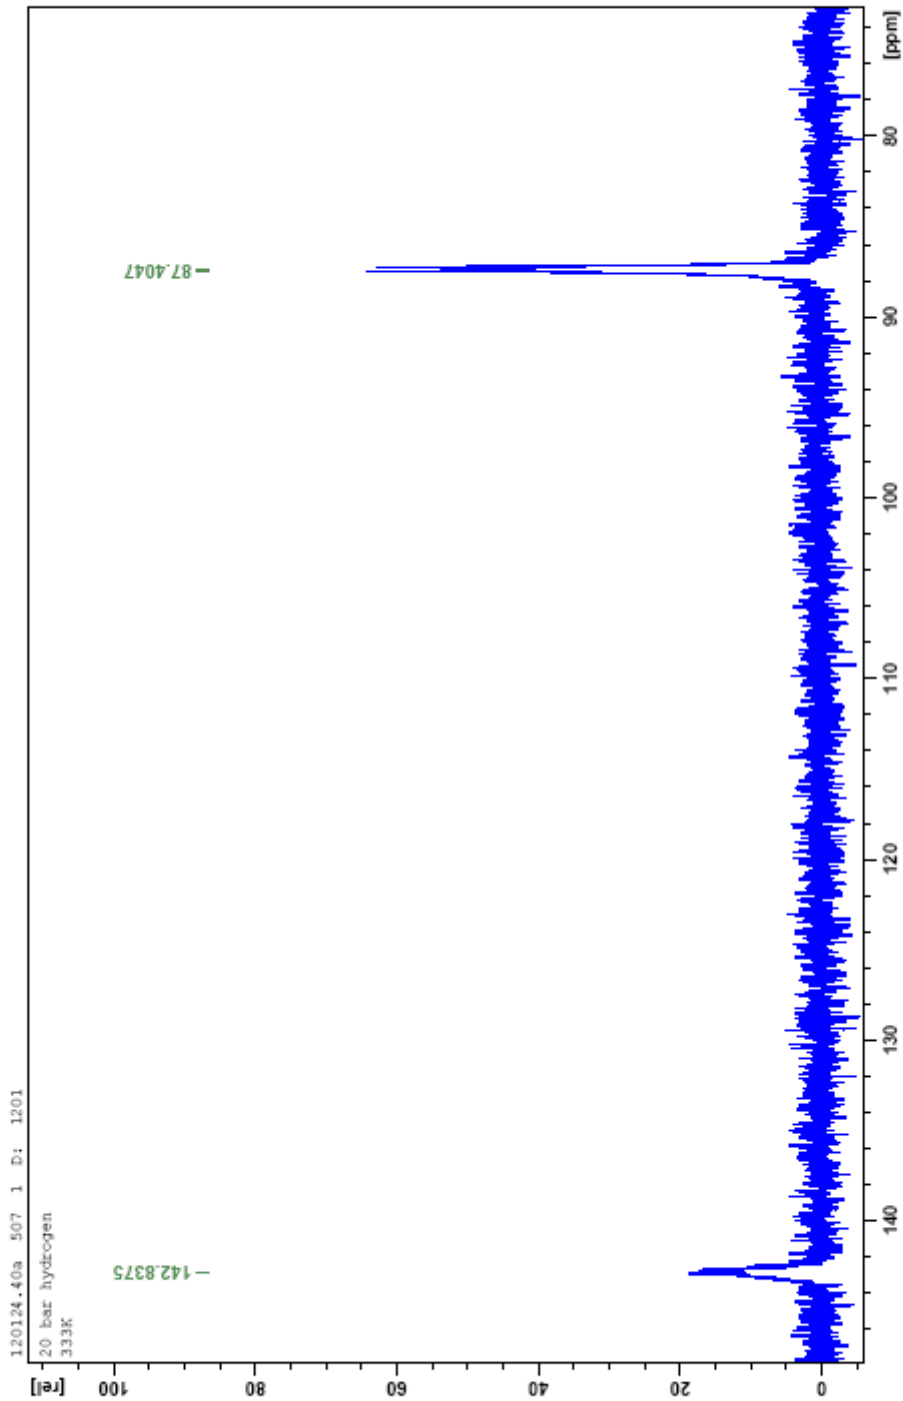

## S4. Preparation of the defined complexes

---

$\text{Fe}(\text{BF}_4)_2 \cdot 6\text{H}_2\text{O}$  and **L1** were purchased from Sigma-Aldrich. The ligand **L2** was synthesized according to the Literature.<sup>[2]</sup> The molecular defined complexes  $[\text{FeF}(\text{L1})][\text{BF}_4]$  was synthesized according to literature protocols.<sup>[3]</sup> Synthesis for  $[\text{FeF}(\text{L2})][\text{BF}_4]$  :

186 mg  $\text{Fe}(\text{BF}_4)_2 \cdot 6\text{H}_2\text{O}$  (0.276 mmol) and 450 mg of the ligand **L2** (1 equiv) were solved in 25 mL THF and slowly a purple precipitate occurred. After stirring for 20 min 500 mg (93%) of  $[\text{FeF}(\text{L2})][\text{BF}_4]$  could be isolated. The complex is paramagnetic. HRMS: calculated:  $\text{C}_{54}\text{H}_{42}\text{FFeP}_4$ : 889.15662; found: 889.15626

## S5. General Procedure for hydrogenation of nitroarene

---

General procedure for the hydrogenation of nitrobenzene: 9.8 mg  $[\text{FeF}(\text{T}_2)][\text{BF}_4]$  (2 mol%) are placed in an autoclave under argon atmosphere. 1.5 mL t-AmOH, 52  $\mu\text{L}$  nitrobenzene (0.5 mmol) and 40  $\mu\text{L}$  TFA (0.5 mmol) are added. The argon atmosphere is replaced by 20 bar of hydrogen. The autoclave is heated to 120 °C for 2 h while the solution is continuously stirred. After cooling to room temperature, 100  $\mu\text{L}$  *n*-hexadecane are added as an internal standard for GC-analysis. The reaction solution is neutralized with a saturated  $\text{NaHCO}_3$ -solution. A sample is taken for GC-analysis, conversions and yields are determined by comparison with authentic samples.

## S6. References

---

- [1] D. C. Roe, *J. Magn. Reson.* **1985**, 63, 388.
- [2] B. Chiswell and L. M. Venanzi, *J. Chem. Soc. A*, **1966**, 417-419.
- [3] C. Bianchini, M. Peruzzini, A. Ceccanti, F. Laschi, P. Zanello, *Inorg. Chim. Acta* **1997**, 259, 61-70.
